# Supplementary material for: Sleep disorder and apnea events detection framework with high performance using two-tier learning model design
Source: PeerJ journal article supplement (doi:10.7717/peerj-cs.1554), 2023-09-29
Supplement: Annex1DataTable.pdf [file Annex1DataTable.pdf]

**DATA TABLE FOR EACH PATIENT (BEFORE AND AFTER UNDER-SAMPLING)**

| PatientID | Before Undersampling Data Size |          |         |         | After Undersampling Data Size |          |        |        |
|-----------|--------------------------------|----------|---------|---------|-------------------------------|----------|--------|--------|
|           | Apnea                          | Hypopnea | Normal  | Total   | Apnea                         | Hypopnea | Normal | Total  |
| 1         | 5600                           | 2000     | 4462400 | 4470000 | 5600                          | 2000     | 2000   | 9600   |
| 2         | 2000                           | 6000     | 4492000 | 4500000 | 2000                          | 6000     | 2000   | 10000  |
| 3         | 3400                           | 4000     | 4630600 | 4638000 | 3400                          | 4000     | 3400   | 10800  |
| 4         | 3000                           | 6000     | 4763400 | 4772400 | 3000                          | 6000     | 3000   | 12000  |
| 5         | 5800                           | 4000     | 4762600 | 4772400 | 5800                          | 4000     | 4000   | 13800  |
| 6         | 4800                           | 6000     | 4477200 | 4488000 | 4800                          | 6000     | 4800   | 15600  |
| 7         | 14000                          | 2000     | 4586000 | 4602000 | 14000                         | 2000     | 2000   | 18000  |
| 8         | 10000                          | 4000     | 4702000 | 4716000 | 10000                         | 4000     | 4000   | 18000  |
| 9         | 14200                          | 2000     | 4747800 | 4764000 | 14200                         | 2000     | 2000   | 18200  |
| 10        | 3000                           | 16000    | 4625000 | 4644000 | 3000                          | 16000    | 3000   | 22000  |
| 11        | 7200                           | 8000     | 4694800 | 4710000 | 7200                          | 8000     | 7200   | 22400  |
| 12        | 2000                           | 20000    | 4322000 | 4344000 | 2000                          | 20000    | 2000   | 24000  |
| 13        | 4000                           | 18000    | 4478000 | 4500000 | 4000                          | 18000    | 4000   | 26000  |
| 14        | 2600                           | 22000    | 4739400 | 4764000 | 2600                          | 22000    | 2600   | 27200  |
| 15        | 2000                           | 24000    | 4746400 | 4772400 | 2000                          | 24000    | 2000   | 28000  |
| 16        | 7600                           | 14000    | 4750800 | 4772400 | 7600                          | 14000    | 7600   | 29200  |
| 17        | 26000                          | 2000     | 4340000 | 4368000 | 26000                         | 2000     | 2000   | 30000  |
| 18        | 26000                          | 4000     | 4530000 | 4560000 | 26000                         | 4000     | 4000   | 34000  |
| 19        | 8000                           | 18000    | 4636000 | 4662000 | 8000                          | 18000    | 8000   | 34000  |
| 20        | 10600                          | 14000    | 4457400 | 4482000 | 10600                         | 14000    | 10600  | 35200  |
| 21        | 19400                          | 8000     | 4544600 | 4572000 | 19400                         | 8000     | 8000   | 35400  |
| 22        | 24000                          | 6000     | 4722000 | 4752000 | 24000                         | 6000     | 6000   | 36000  |
| 23        | 16600                          | 12000    | 4743800 | 4772400 | 16600                         | 12000    | 12000  | 40600  |
| 24        | 13600                          | 20000    | 4394400 | 4428000 | 13600                         | 20000    | 13600  | 47200  |
| 25        | 14400                          | 20000    | 4738000 | 4772400 | 14400                         | 20000    | 14400  | 48800  |
| 26        | 32400                          | 10000    | 4505600 | 4548000 | 32400                         | 10000    | 10000  | 52400  |
| 27        | 16800                          | 30000    | 4627200 | 4674000 | 16800                         | 30000    | 16800  | 63600  |
| 28        | 14000                          | 36000    | 4402000 | 4452000 | 14000                         | 36000    | 14000  | 64000  |
| 29        | 21400                          | 22000    | 4474600 | 4518000 | 21400                         | 22000    | 21400  | 64800  |
| 30        | 10200                          | 44400    | 4553400 | 4608000 | 10200                         | 44400    | 10200  | 64800  |
| 31        | 8000                           | 52000    | 4488000 | 4548000 | 8000                          | 52000    | 8000   | 68000  |
| 32        | 14200                          | 42000    | 4287800 | 4344000 | 14200                         | 42000    | 14200  | 70400  |
| 33        | 8800                           | 54000    | 4455200 | 4518000 | 8800                          | 54000    | 8800   | 71600  |
| 34        | 28000                          | 22000    | 4426000 | 4476000 | 28000                         | 22000    | 22000  | 72000  |
| 35        | 11600                          | 52000    | 4532400 | 4596000 | 11600                         | 52000    | 11600  | 75200  |
| 36        | 21200                          | 38000    | 4500800 | 4560000 | 21200                         | 38000    | 21200  | 80400  |
| 37        | 21200                          | 44000    | 4518800 | 4584000 | 21200                         | 44000    | 21200  | 86400  |
| 38        | 4800                           | 78000    | 4285200 | 4368000 | 4800                          | 78000    | 4800   | 87600  |
| 39        | 3200                           | 90000    | 4679200 | 4772400 | 3200                          | 90000    | 3200   | 96400  |
| 40        | 21400                          | 54000    | 4250600 | 4326000 | 21400                         | 54000    | 21400  | 96800  |
| 41        | 10400                          | 80000    | 4553600 | 4644000 | 10400                         | 80000    | 10400  | 100800 |
| 42        | 15200                          | 82000    | 4276800 | 4374000 | 15200                         | 82000    | 15200  | 112400 |
| 43        | 31600                          | 54800    | 4455600 | 4542000 | 31600                         | 54800    | 31600  | 118000 |

**DATA TABLE FOR EACH PATIENT (BEFORE AND AFTER UNDER-SAMPLING)**

|               |        |         |          |          |        |         |        |         |
|---------------|--------|---------|----------|----------|--------|---------|--------|---------|
| 44            | 9800   | 114000  | 4250200  | 4374000  | 9800   | 114000  | 9800   | 133600  |
| 45            | 18400  | 100000  | 4654000  | 4772400  | 18400  | 100000  | 18400  | 136800  |
| 46            | 38200  | 62000   | 4387800  | 4488000  | 38200  | 62000   | 38200  | 138400  |
| 47            | 43400  | 84000   | 4588600  | 4716000  | 43400  | 84000   | 43400  | 170800  |
| 48            | 20000  | 132000  | 4396000  | 4548000  | 20000  | 132000  | 20000  | 172000  |
| 49            | 37000  | 106000  | 4489000  | 4632000  | 37000  | 106000  | 37000  | 180000  |
| 50            | 50000  | 98000   | 4526000  | 4674000  | 50000  | 98000   | 50000  | 198000  |
| Total<br>Data | 761000 | 1843200 | 2,27E+08 | 2,29E+08 | 761000 | 1843200 | 617000 | 3221200 |
| Average       | 15220  | 36864   | 4533020  | 4585104  | 15220  | 36864   | 12340  | 64424   |
