# Supplementary material for: Sleep disorder and apnea events detection framework with high performance using two-tier learning model design
Source: PeerJ journal article supplement (doi:10.7717/peerj-cs.1554), 2023-09-29
Supplement: Annex2AllResults.pdf [file Annex2AllResults.pdf]

Table with All Results

| Patient ID | DNN      |           |        |        | GRU      |           |        |        | RNN      |           |        |        | LSTM     |           |        |        | Proposed Model |           |        |        |
|------------|----------|-----------|--------|--------|----------|-----------|--------|--------|----------|-----------|--------|--------|----------|-----------|--------|--------|----------------|-----------|--------|--------|
|            | Accuracy | Precision | Recall | Fscore | Accuracy | Precision | Recall | Fscore | Accuracy | Precision | Recall | Fscore | Accuracy | Precision | Recall | Fscore | Accuracy       | Precision | Recall | Fscore |
| 1          | 0,9427   | 0,9425    | 0,9427 | 0,9426 | 0,9531   | 0,9533    | 0,9531 | 0,9518 | 0,9219   | 0,9206    | 0,9219 | 0,9198 | 0,9597   | 0,9596    | 0,9597 | 0,9589 | 0,9688         | 0,9686    | 0,9688 | 0,9684 |
| 2          | 0,9603   | 0,9600    | 0,9603 | 0,9599 | 0,9493   | 0,9493    | 0,9493 | 0,9478 | 0,9293   | 0,9279    | 0,9293 | 0,9282 | 0,9517   | 0,9523    | 0,9517 | 0,9498 | 0,9723         | 0,9725    | 0,9723 | 0,9718 |
| 3          | 0,9772   | 0,9771    | 0,9772 | 0,9771 | 0,9815   | 0,9818    | 0,9815 | 0,9814 | 0,9838   | 0,9844    | 0,9838 | 0,9836 | 0,9787   | 0,9792    | 0,9787 | 0,9786 | 0,9846         | 0,9847    | 0,9846 | 0,9845 |
| 4          | 0,9614   | 0,9616    | 0,9614 | 0,9610 | 0,9528   | 0,9526    | 0,9528 | 0,9520 | 0,9339   | 0,9331    | 0,9339 | 0,9332 | 0,9525   | 0,9522    | 0,9525 | 0,9522 | 0,9719         | 0,9718    | 0,9719 | 0,9718 |
| 5          | 0,9783   | 0,9783    | 0,9783 | 0,9782 | 0,9804   | 0,9807    | 0,9804 | 0,9803 | 0,9792   | 0,9794    | 0,9792 | 0,9791 | 0,9862   | 0,9864    | 0,9862 | 0,9862 | 0,9899         | 0,9899    | 0,9899 | 0,9898 |
| 6          | 0,9380   | 0,9384    | 0,9380 | 0,9381 | 0,9393   | 0,9390    | 0,9393 | 0,9391 | 0,9184   | 0,9183    | 0,9184 | 0,9175 | 0,9427   | 0,9426    | 0,9427 | 0,9426 | 0,9558         | 0,9557    | 0,9558 | 0,9558 |
| 7          | 0,9804   | 0,9803    | 0,9804 | 0,9797 | 0,9767   | 0,9763    | 0,9767 | 0,9759 | 0,9696   | 0,9691    | 0,9696 | 0,9682 | 0,9800   | 0,9799    | 0,9800 | 0,9793 | 0,9848         | 0,9851    | 0,9848 | 0,9843 |
| 8          | 0,9600   | 0,9599    | 0,9600 | 0,9594 | 0,9530   | 0,9525    | 0,9530 | 0,9525 | 0,9554   | 0,9550    | 0,9554 | 0,9551 | 0,9656   | 0,9653    | 0,9656 | 0,9651 | 0,9720         | 0,9720    | 0,9720 | 0,9717 |
| 9          | 0,9742   | 0,9740    | 0,9742 | 0,9735 | 0,9637   | 0,9632    | 0,9637 | 0,9633 | 0,9678   | 0,9673    | 0,9678 | 0,9672 | 0,9659   | 0,9653    | 0,9659 | 0,9653 | 0,9800         | 0,9798    | 0,9800 | 0,9797 |
| 10         | 0,9658   | 0,9652    | 0,9658 | 0,9651 | 0,9468   | 0,9460    | 0,9468 | 0,9463 | 0,9580   | 0,9579    | 0,9580 | 0,9558 | 0,9567   | 0,9558    | 0,9567 | 0,9549 | 0,9673         | 0,9669    | 0,9673 | 0,9662 |
| 11         | 0,9516   | 0,9529    | 0,9516 | 0,9509 | 0,9638   | 0,9638    | 0,9638 | 0,9637 | 0,9549   | 0,9553    | 0,9549 | 0,9544 | 0,9606   | 0,9605    | 0,9606 | 0,9605 | 0,9744         | 0,9747    | 0,9744 | 0,9742 |
| 12         | 0,9708   | 0,9696    | 0,9708 | 0,9692 | 0,9629   | 0,9608    | 0,9629 | 0,9611 | 0,9672   | 0,9656    | 0,9672 | 0,9659 | 0,9674   | 0,9658    | 0,9674 | 0,9659 | 0,9775         | 0,9769    | 0,9775 | 0,9764 |
| 13         | 0,9847   | 0,9848    | 0,9847 | 0,9845 | 0,9779   | 0,9778    | 0,9779 | 0,9778 | 0,9695   | 0,9692    | 0,9695 | 0,9689 | 0,9828   | 0,9828    | 0,9828 | 0,9826 | 0,9887         | 0,9887    | 0,9887 | 0,9886 |
| 14         | 0,9788   | 0,9783    | 0,9788 | 0,9784 | 0,9710   | 0,9702    | 0,9710 | 0,9704 | 0,9667   | 0,9656    | 0,9667 | 0,9657 | 0,9739   | 0,9735    | 0,9739 | 0,9728 | 0,9820         | 0,9817    | 0,9820 | 0,9815 |
| 15         | 0,9636   | 0,9637    | 0,9636 | 0,9636 | 0,9633   | 0,9609    | 0,9633 | 0,9613 | 0,9608   | 0,9586    | 0,9608 | 0,9561 | 0,9454   | 0,9418    | 0,9454 | 0,9389 | 0,9718         | 0,9705    | 0,9718 | 0,9700 |
| 16         | 0,9255   | 0,9256    | 0,9255 | 0,9248 | 0,8973   | 0,8967    | 0,8973 | 0,8966 | 0,8775   | 0,8774    | 0,8775 | 0,8769 | 0,9129   | 0,9129    | 0,9129 | 0,9122 | 0,9379         | 0,9377    | 0,9379 | 0,9375 |
| 17         | 0,9776   | 0,9773    | 0,9776 | 0,9769 | 0,9728   | 0,9723    | 0,9728 | 0,9723 | 0,9629   | 0,9617    | 0,9629 | 0,9618 | 0,9728   | 0,9723    | 0,9728 | 0,9721 | 0,9808         | 0,9806    | 0,9808 | 0,9802 |
| 18         | 0,9668   | 0,9671    | 0,9668 | 0,9665 | 0,9648   | 0,9648    | 0,9648 | 0,9643 | 0,9596   | 0,9594    | 0,9596 | 0,9591 | 0,9653   | 0,9651    | 0,9653 | 0,9650 | 0,9767         | 0,9768    | 0,9767 | 0,9764 |
| 19         | 0,9808   | 0,9805    | 0,9808 | 0,9802 | 0,9754   | 0,9748    | 0,9754 | 0,9748 | 0,9661   | 0,9651    | 0,9661 | 0,9654 | 0,9762   | 0,9757    | 0,9762 | 0,9755 | 0,9838         | 0,9836    | 0,9838 | 0,9834 |
| 20         | 0,9504   | 0,9502    | 0,9504 | 0,9502 | 0,9498   | 0,9497    | 0,9498 | 0,9497 | 0,9339   | 0,9336    | 0,9339 | 0,9333 | 0,9574   | 0,9574    | 0,9574 | 0,9571 | 0,9680         | 0,9679    | 0,9680 | 0,9679 |
| 21         | 0,9819   | 0,9819    | 0,9819 | 0,9818 | 0,9706   | 0,9704    | 0,9706 | 0,9704 | 0,9649   | 0,9648    | 0,9649 | 0,9644 | 0,9770   | 0,9770    | 0,9770 | 0,9768 | 0,9846         | 0,9846    | 0,9846 | 0,9845 |
| 22         | 0,9486   | 0,9479    | 0,9486 | 0,9472 | 0,9489   | 0,9482    | 0,9489 | 0,9473 | 0,9264   | 0,9247    | 0,9264 | 0,9230 | 0,9468   | 0,9458    | 0,9468 | 0,9460 | 0,9589         | 0,9585    | 0,9589 | 0,9578 |
| 23         | 0,9716   | 0,9715    | 0,9716 | 0,9715 | 0,9539   | 0,9538    | 0,9539 | 0,9536 | 0,9300   | 0,9297    | 0,9300 | 0,9298 | 0,9566   | 0,9564    | 0,9566 | 0,9563 | 0,9745         | 0,9745    | 0,9745 | 0,9745 |
| 24         | 0,9335   | 0,9338    | 0,9335 | 0,9330 | 0,9028   | 0,9026    | 0,9028 | 0,9020 | 0,8497   | 0,8502    | 0,8497 | 0,8494 | 0,9133   | 0,9130    | 0,9133 | 0,9127 | 0,9436         | 0,9435    | 0,9436 | 0,9434 |
| 25         | 0,9474   | 0,9488    | 0,9474 | 0,9470 | 0,9141   | 0,9143    | 0,9141 | 0,9137 | 0,9033   | 0,9043    | 0,9033 | 0,9031 | 0,9284   | 0,9295    | 0,9284 | 0,9281 | 0,9496         | 0,9503    | 0,9496 | 0,9493 |
| 26         | 0,9695   | 0,9693    | 0,9695 | 0,9690 | 0,9572   | 0,9567    | 0,9572 | 0,9566 | 0,9527   | 0,9521    | 0,9527 | 0,9520 | 0,9622   | 0,9619    | 0,9622 | 0,9617 | 0,9746         | 0,9745    | 0,9746 | 0,9742 |
| 27         | 0,9626   | 0,9628    | 0,9626 | 0,9624 | 0,9377   | 0,9378    | 0,9377 | 0,9374 | 0,9297   | 0,9304    | 0,9297 | 0,9291 | 0,9439   | 0,9441    | 0,9439 | 0,9435 | 0,9654         | 0,9658    | 0,9654 | 0,9652 |
| 28         | 0,9299   | 0,9305    | 0,9299 | 0,9287 | 0,9030   | 0,9024    | 0,9030 | 0,9022 | 0,8699   | 0,8697    | 0,8699 | 0,8681 | 0,9149   | 0,9146    | 0,9149 | 0,9142 | 0,9403         | 0,9401    | 0,9403 | 0,9396 |
| 29         | 0,9230   | 0,9236    | 0,9230 | 0,9232 | 0,9164   | 0,9168    | 0,9164 | 0,9162 | 0,8960   | 0,8958    | 0,8960 | 0,8955 | 0,9179   | 0,9180    | 0,9179 | 0,9175 | 0,9363         | 0,9364    | 0,9363 | 0,9363 |
| 30         | 0,9550   | 0,9544    | 0,9550 | 0,9545 | 0,9367   | 0,9354    | 0,9367 | 0,9357 | 0,9137   | 0,9114    | 0,9137 | 0,9108 | 0,9482   | 0,9473    | 0,9482 | 0,9475 | 0,9668         | 0,9664    | 0,9668 | 0,9663 |
| 31         | 0,9597   | 0,9593    | 0,9597 | 0,9579 | 0,9480   | 0,9472    | 0,9480 | 0,9456 | 0,9320   | 0,9303    | 0,9320 | 0,9276 | 0,9444   | 0,9424    | 0,9444 | 0,9423 | 0,9627         | 0,9628    | 0,9627 | 0,9609 |
| 32         | 0,8878   | 0,8868    | 0,8878 | 0,8848 | 0,8762   | 0,8741    | 0,8762 | 0,8740 | 0,8401   | 0,8389    | 0,8401 | 0,8314 | 0,8974   | 0,8958    | 0,8974 | 0,8937 | 0,9130         | 0,9125    | 0,9130 | 0,9107 |
| 33         | 0,9588   | 0,9580    | 0,9588 | 0,9573 | 0,9453   | 0,9435    | 0,9453 | 0,9436 | 0,9292   | 0,9261    | 0,9292 | 0,9257 | 0,9483   | 0,9468    | 0,9483 | 0,9468 | 0,9646         | 0,9642    | 0,9646 | 0,9634 |
| 34         | 0,9538   | 0,9537    | 0,9538 | 0,9536 | 0,9454   | 0,9452    | 0,9454 | 0,9452 | 0,9260   | 0,9257    | 0,9260 | 0,9253 | 0,9473   | 0,9471    | 0,9473 | 0,9470 | 0,9678         | 0,9677    | 0,9678 | 0,9677 |
| 35         | 0,9442   | 0,9448    | 0,9442 | 0,9426 | 0,9093   | 0,9091    | 0,9093 | 0,9076 | 0,8901   | 0,8887    | 0,8901 | 0,8879 | 0,9284   | 0,9271    | 0,9284 | 0,9271 | 0,9456         | 0,9455    | 0,9456 | 0,9443 |
| 36         | 0,9123   | 0,9120    | 0,9123 | 0,9119 | 0,8813   | 0,8801    | 0,8813 | 0,8803 | 0,8461   | 0,8445    | 0,8461 | 0,8439 | 0,8892   | 0,8884    | 0,8892 | 0,8886 | 0,9185         | 0,9183    | 0,9185 | 0,9184 |
| 37         | 0,9412   | 0,9414    | 0,9412 | 0,9401 | 0,9212   | 0,9206    | 0,9212 | 0,9203 | 0,9041   | 0,9036    | 0,9041 | 0,9023 | 0,9313   | 0,9311    | 0,9313 | 0,9302 | 0,9470         | 0,9471    | 0,9470 | 0,9463 |
| 38         | 0,9656   | 0,9625    | 0,9656 | 0,9623 | 0,9546   | 0,9503    | 0,9546 | 0,9453 | 0,9520   | 0,9456    | 0,9520 | 0,9414 | 0,9557   | 0,9498    | 0,9557 | 0,9501 | 0,9656         | 0,9645    | 0,9656 | 0,9598 |
| 39         | 0,9799   | 0,9785    | 0,9799 | 0,9766 | 0,9789   | 0,9779    | 0,9789 | 0,9751 | 0,9781   | 0,9780    | 0,9781 | 0,9740 | 0,9790   | 0,9779    | 0,9790 | 0,9754 | 0,9809         | 0,9809    | 0,9809 | 0,9773 |
| 40         | 0,9274   | 0,9292    | 0,9274 | 0,9247 | 0,9092   | 0,9082    | 0,9092 | 0,9072 | 0,8824   | 0,8809    | 0,8824 | 0,8791 | 0,9150   | 0,9140    | 0,9150 | 0,9131 | 0,9424         | 0,9429    | 0,9424 | 0,9408 |
| 41         | 0,9240   | 0,9215    | 0,9240 | 0,9189 | 0,9270   | 0,9205    | 0,9270 | 0,9196 | 0,8923   | 0,8907    | 0,8923 | 0,8909 | 0,9238   | 0,9221    | 0,9238 | 0,9219 | 0,9643         | 0,9636    | 0,9643 | 0,9638 |

**Table with All Results**

|                | DNN           |               |               |               | GRU           |               |               |               | RNN           |               |               |               | LSTM          |               |               |               | Proposed Model |               |               |               |
|----------------|---------------|---------------|---------------|---------------|---------------|---------------|---------------|---------------|---------------|---------------|---------------|---------------|---------------|---------------|---------------|---------------|----------------|---------------|---------------|---------------|
| Patient ID     | Accuracy      | Precision     | Recall        | Fscore        | Accuracy      | Precision     | Recall        | Fscore        | Accuracy      | Precision     | Recall        | Fscore        | Accuracy      | Precision     | Recall        | Fscore        | Accuracy       | Precision     | Recall        | Fscore        |
| 42             | 0,9380        | 0,9373        | 0,9380        | 0,9358        | 0,9178        | 0,9156        | 0,9178        | 0,9156        | 0,8968        | 0,8932        | 0,8968        | 0,8915        | 0,9243        | 0,9221        | 0,9243        | 0,9223        | 0,9430         | 0,9420        | 0,9430        | 0,9410        |
| 43             | 0,8992        | 0,8986        | 0,8992        | 0,8984        | 0,8653        | 0,8648        | 0,8653        | 0,8639        | 0,8241        | 0,8261        | 0,8241        | 0,8206        | 0,8779        | 0,8777        | 0,8779        | 0,8759        | 0,9108         | 0,9104        | 0,9108        | 0,9099        |
| 44             | 0,8889        | 0,8887        | 0,8889        | 0,8875        | 0,8881        | 0,8868        | 0,8881        | 0,8873        | 0,8763        | 0,8741        | 0,8763        | 0,8740        | 0,8965        | 0,8951        | 0,8965        | 0,8955        | 0,9177         | 0,9177        | 0,9177        | 0,9164        |
| 45             | 0,8958        | 0,8972        | 0,8958        | 0,8940        | 0,8766        | 0,8746        | 0,8766        | 0,8753        | 0,8542        | 0,8553        | 0,8542        | 0,8539        | 0,8739        | 0,8720        | 0,8739        | 0,8721        | 0,9033         | 0,9019        | 0,9033        | 0,9022        |
| 46             | 0,8988        | 0,8993        | 0,8988        | 0,8970        | 0,9015        | 0,9002        | 0,9015        | 0,9005        | 0,8811        | 0,8802        | 0,8811        | 0,8775        | 0,9072        | 0,9061        | 0,9072        | 0,9055        | 0,9356         | 0,9349        | 0,9356        | 0,9342        |
| 47             | 0,8948        | 0,8942        | 0,8948        | 0,8939        | 0,8392        | 0,8377        | 0,8392        | 0,8380        | 0,7884        | 0,7871        | 0,7884        | 0,7860        | 0,8457        | 0,8432        | 0,8457        | 0,8440        | 0,9288         | 0,9280        | 0,9288        | 0,9283        |
| 48             | 0,9064        | 0,9074        | 0,9064        | 0,9057        | 0,9054        | 0,9076        | 0,9054        | 0,9053        | 0,8863        | 0,8857        | 0,8863        | 0,8858        | 0,9126        | 0,9125        | 0,9126        | 0,9117        | 0,9398         | 0,9395        | 0,9398        | 0,9394        |
| 49             | 0,9045        | 0,9061        | 0,9045        | 0,9050        | 0,8899        | 0,8901        | 0,8899        | 0,8898        | 0,8588        | 0,8592        | 0,8588        | 0,8584        | 0,8929        | 0,8925        | 0,8929        | 0,8925        | 0,9232         | 0,9231        | 0,9232        | 0,9231        |
| 50             | 0,8932        | 0,8948        | 0,8932        | 0,8929        | 0,8697        | 0,8698        | 0,8697        | 0,8695        | 0,8391        | 0,8406        | 0,8391        | 0,8393        | 0,8662        | 0,8667        | 0,8662        | 0,8656        | 0,9245         | 0,9244        | 0,9245        | 0,9244        |
| <b>Average</b> | <b>0,9457</b> | <b>0,9457</b> | <b>0,9457</b> | <b>0,9448</b> | <b>0,9337</b> | <b>0,9330</b> | <b>0,9337</b> | <b>0,9325</b> | <b>0,9170</b> | <b>0,9162</b> | <b>0,9170</b> | <b>0,9151</b> | <b>0,9384</b> | <b>0,9377</b> | <b>0,9384</b> | <b>0,9372</b> | <b>0,9577</b>  | <b>0,9575</b> | <b>0,9577</b> | <b>0,9569</b> |
| <b>Min</b>     | <b>0,8878</b> | <b>0,8868</b> | <b>0,8878</b> | <b>0,8848</b> | <b>0,8392</b> | <b>0,8377</b> | <b>0,8392</b> | <b>0,8380</b> | <b>0,7884</b> | <b>0,7871</b> | <b>0,7884</b> | <b>0,7860</b> | <b>0,8457</b> | <b>0,8432</b> | <b>0,8457</b> | <b>0,8440</b> | <b>0,9033</b>  | <b>0,9019</b> | <b>0,9033</b> | <b>0,9022</b> |
| <b>Max</b>     | <b>0,9847</b> | <b>0,9848</b> | <b>0,9847</b> | <b>0,9845</b> | <b>0,9815</b> | <b>0,9818</b> | <b>0,9815</b> | <b>0,9814</b> | <b>0,9838</b> | <b>0,9844</b> | <b>0,9838</b> | <b>0,9836</b> | <b>0,9862</b> | <b>0,9864</b> | <b>0,9862</b> | <b>0,9862</b> | <b>0,9899</b>  | <b>0,9899</b> | <b>0,9899</b> | <b>0,9898</b> |
